# Supplementary material for: Medium term water deficit elicits distinct transcriptome responses in Eucalyptus species of contrasting environmental origin
Source: PubMed Central journal article supplement (PMC5383985; doi:10.1186/s12864-017-3664-z), 2017-04-07

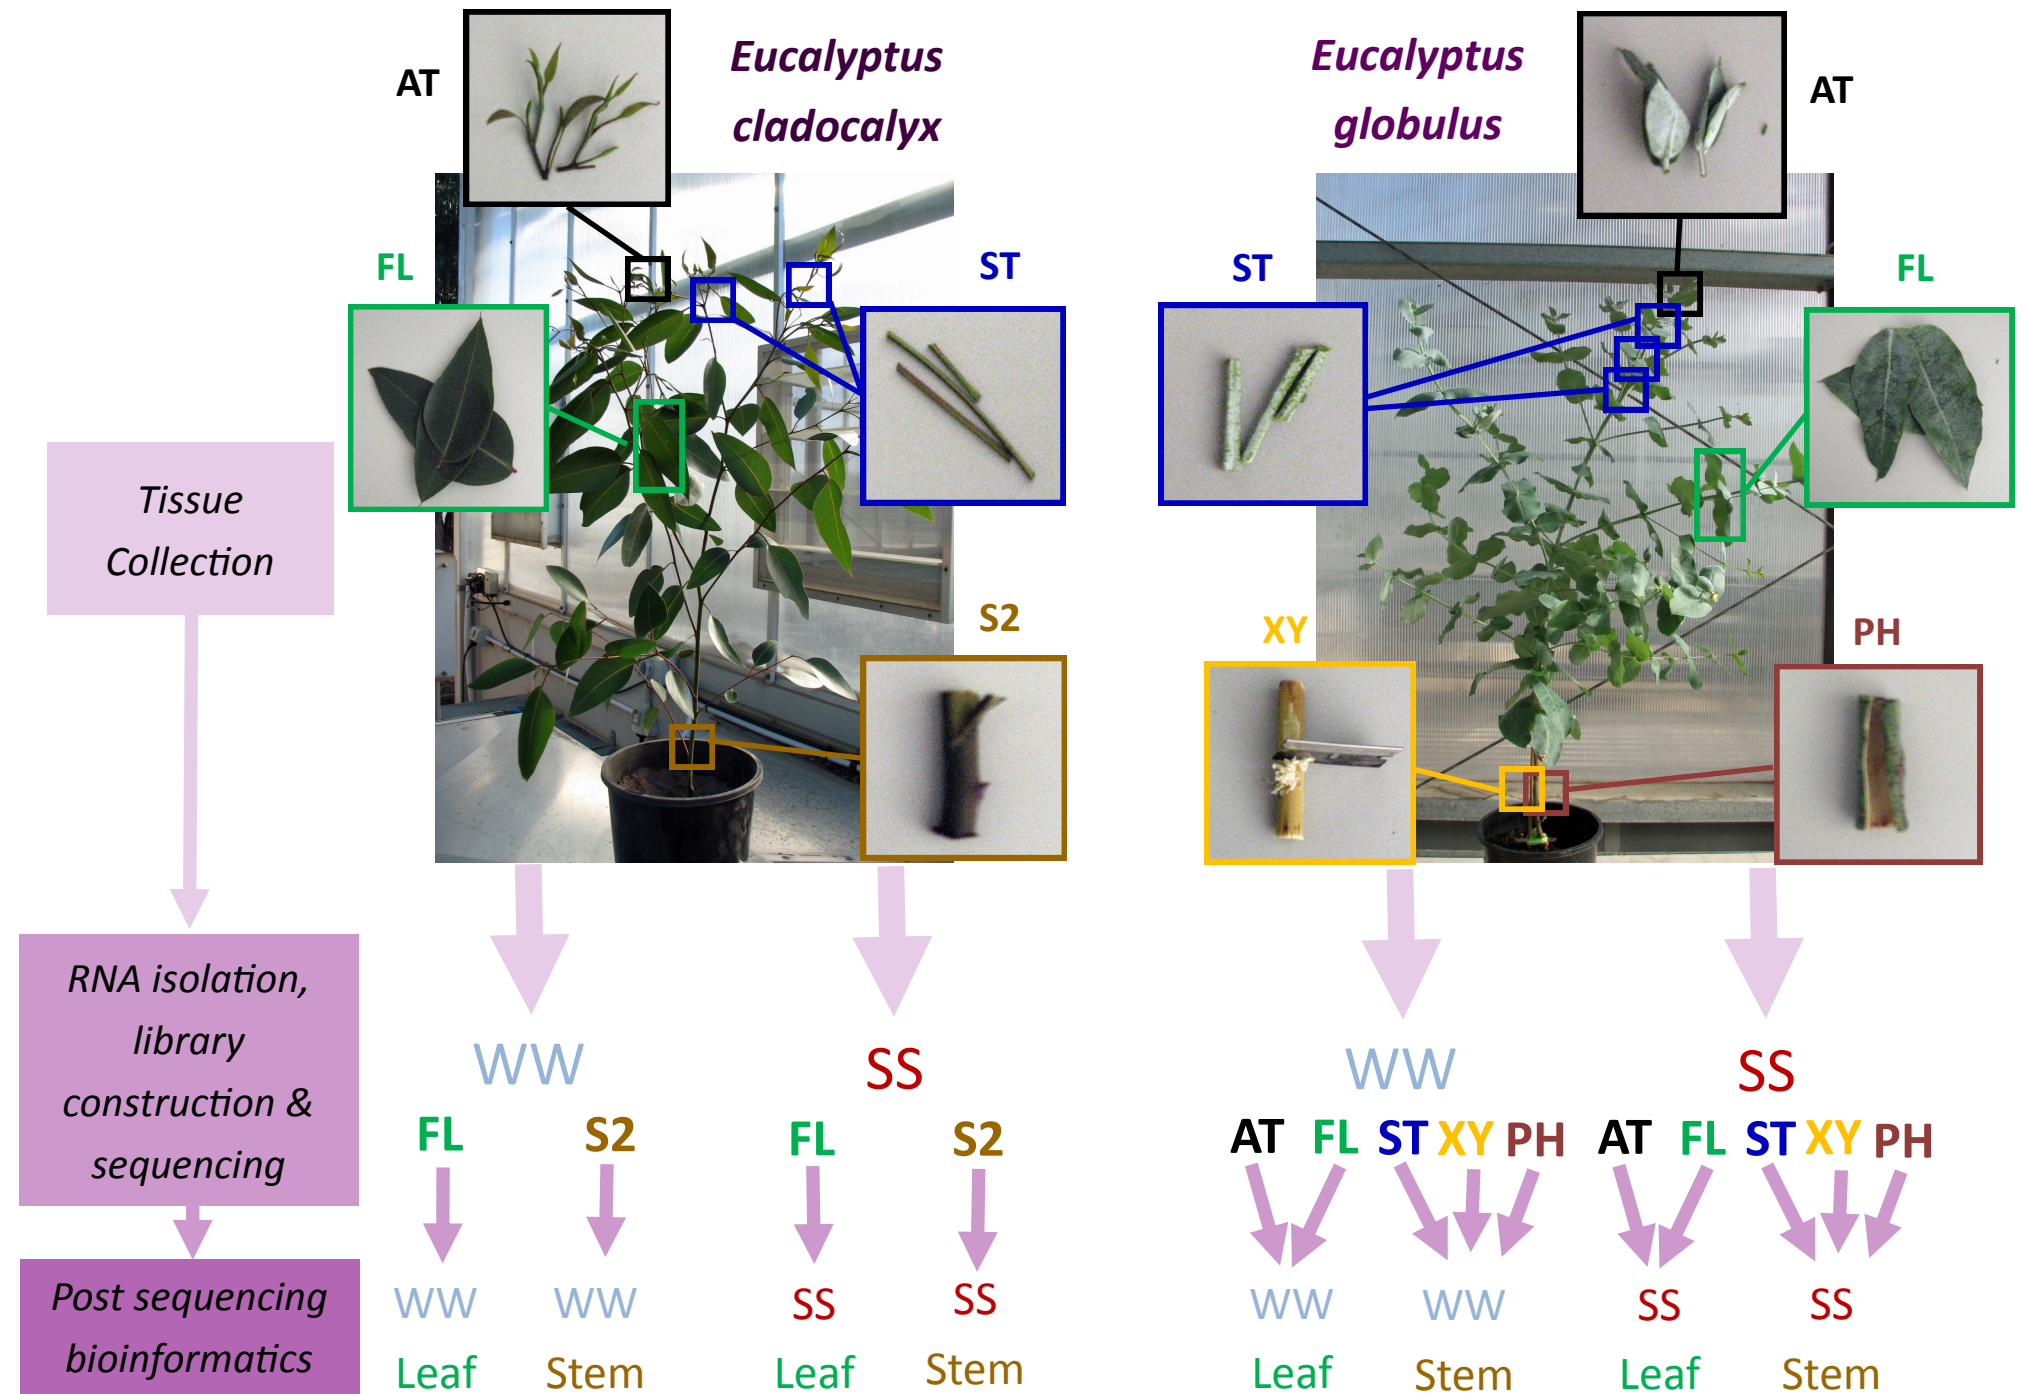

Supplement: 12864_2017_3664_MOESM8_ESM.pdf [file 12864_2017_3664_MOESM8_ESM.pdf]
